# Supplementary figures and images for: Functional interplay between LIS1, NDE1 and NDEL1 in dynein-dependent organelle positioning
Source: Oxford University Press journal article supplement (doi:10.1242/jcs.059337), 2010-01-05

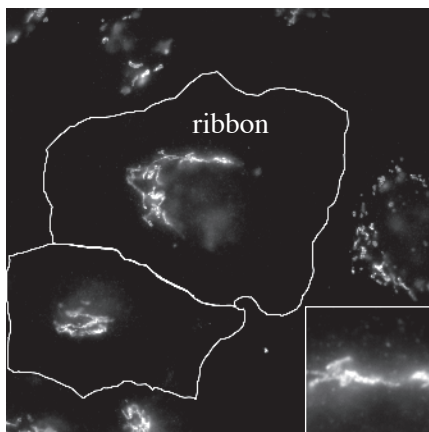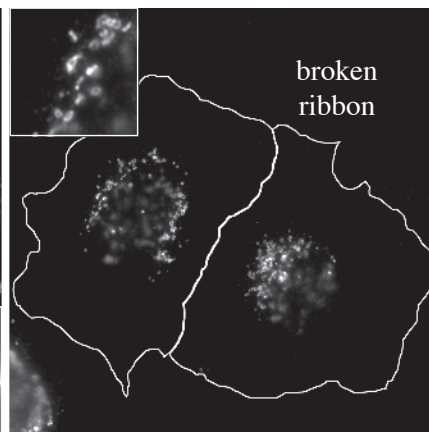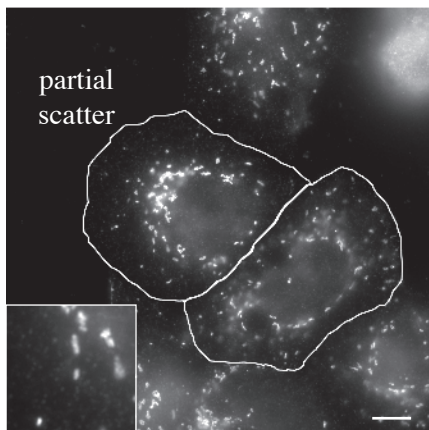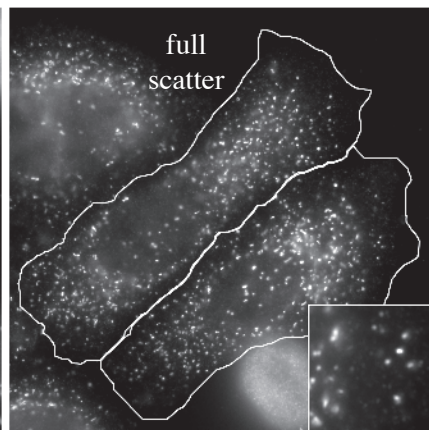

Supplement: jcs059337-sup-059337-figs2.pdf [file jcs059337-sup-059337-figs2.pdf]
